# Supplementary material
Source: Springer Nature journal article supplement (https://www.springermedizin.de/resource/supplementary/12957_2012_1277_MOESM5_ESM.pdf/9562914)

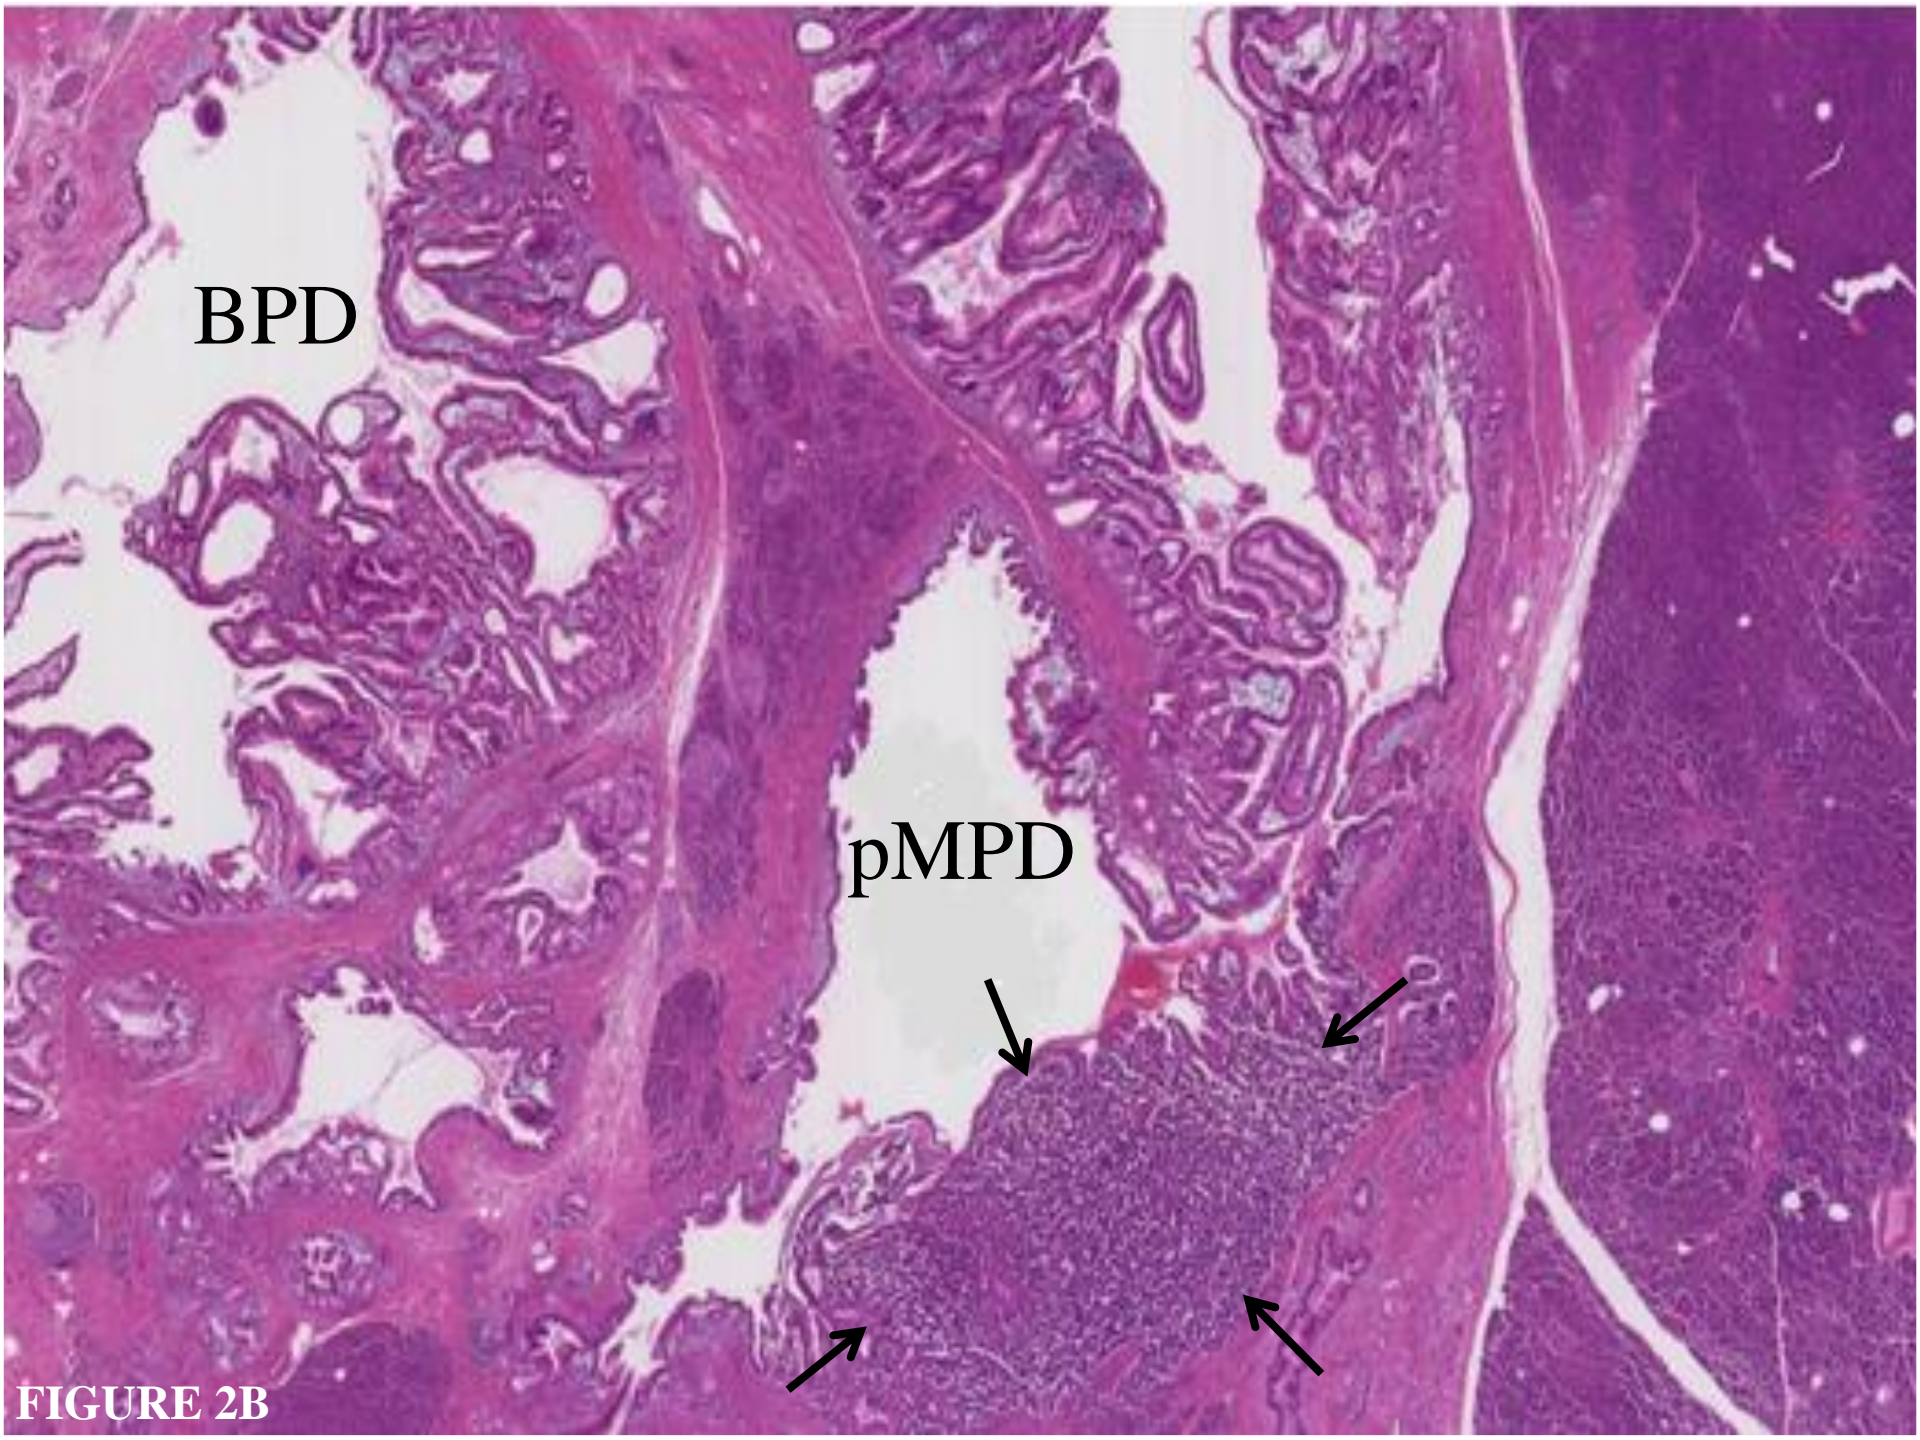

BPD

pMPD

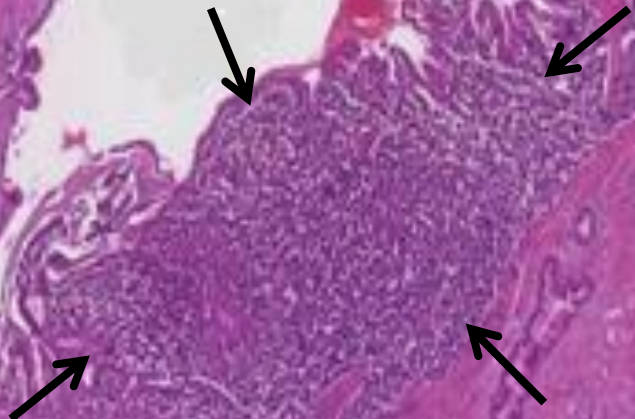

FIGURE 2B

Supplement: MOESM5 [file 9562914]
